# Supplementary material for: High expression of B7-H3 on stromal cells defines tumor and stromal compartments in epithelial ovarian cancer and is associated with limited immune activation
Source: PubMed Central journal article supplement (PMC6937725; doi:10.1186/s40425-019-0816-5), 2019-12-31

B7-H3

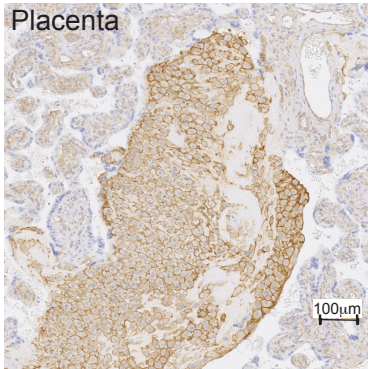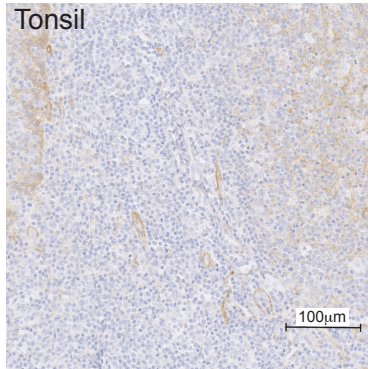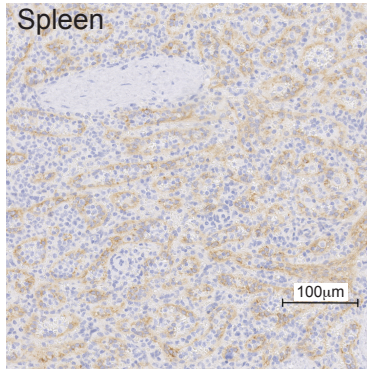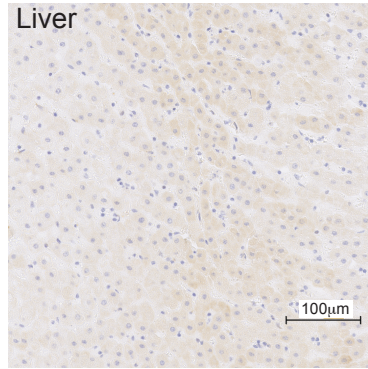

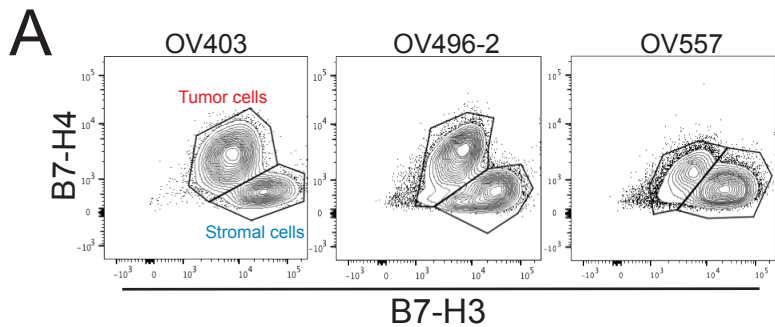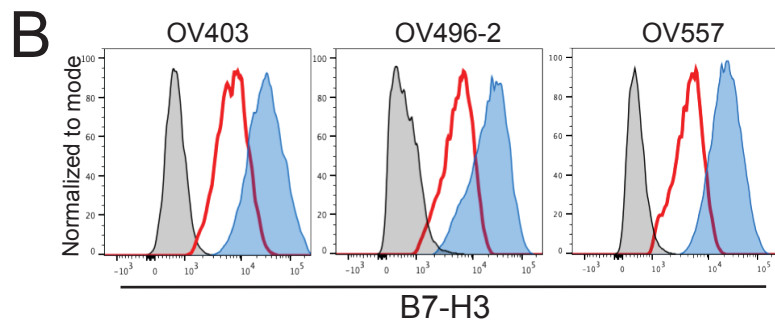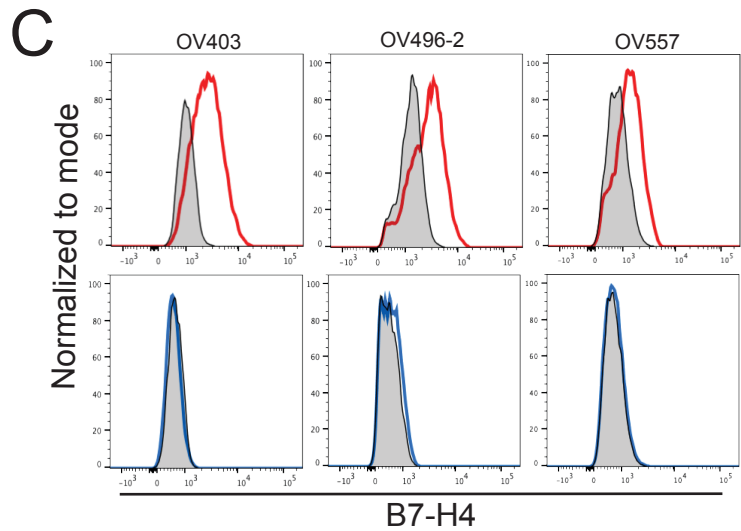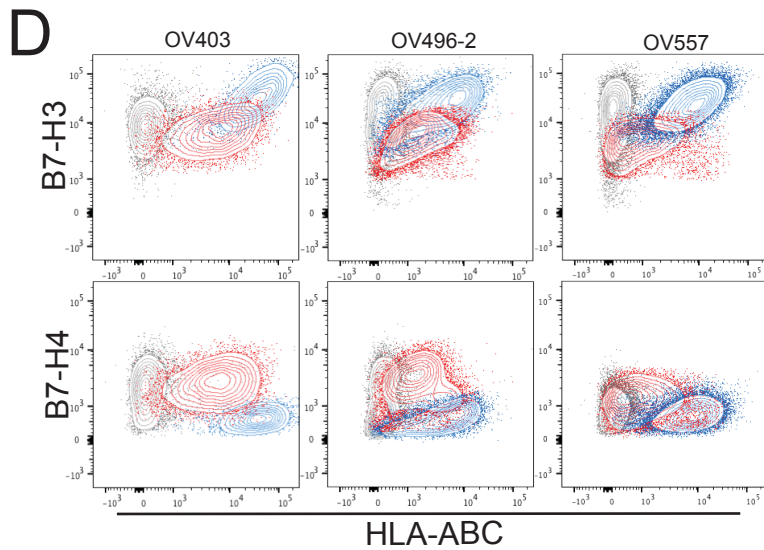

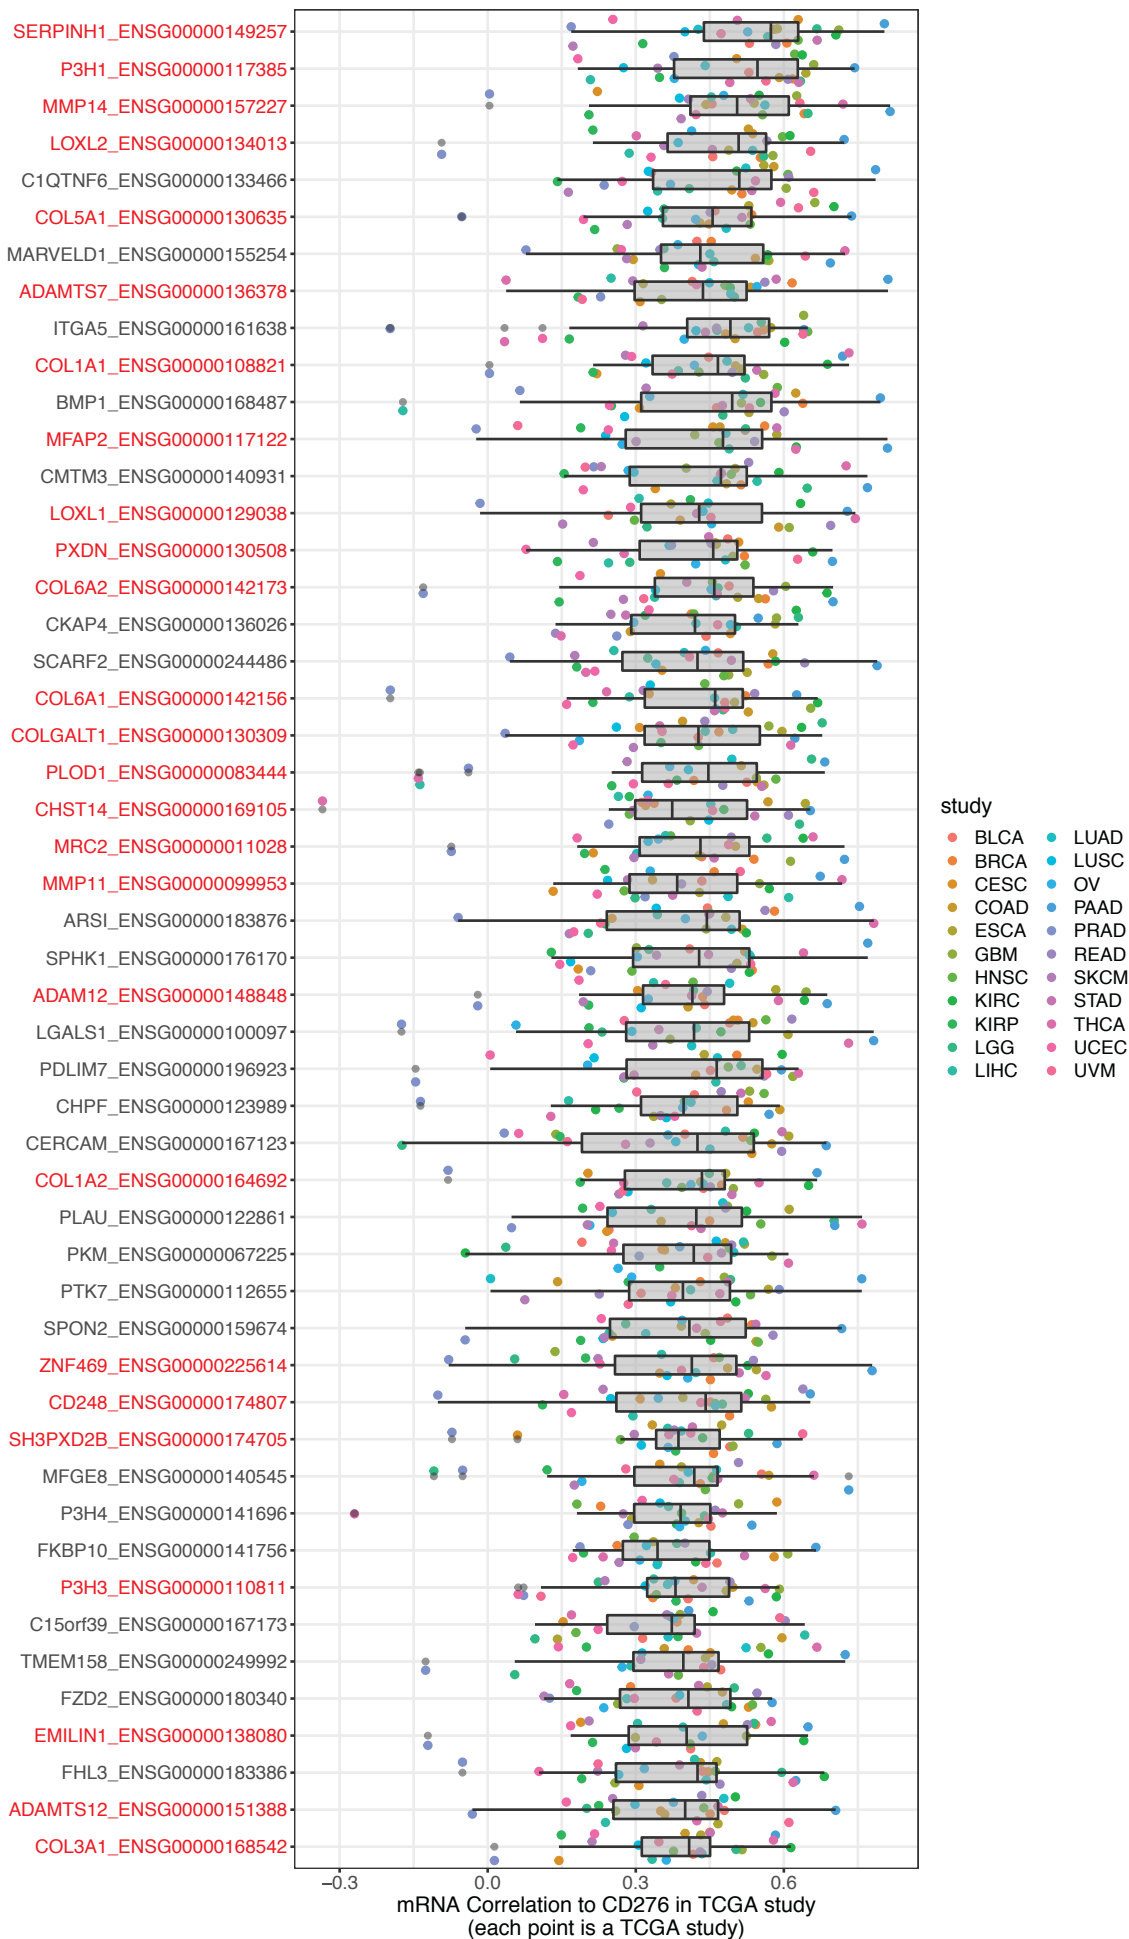

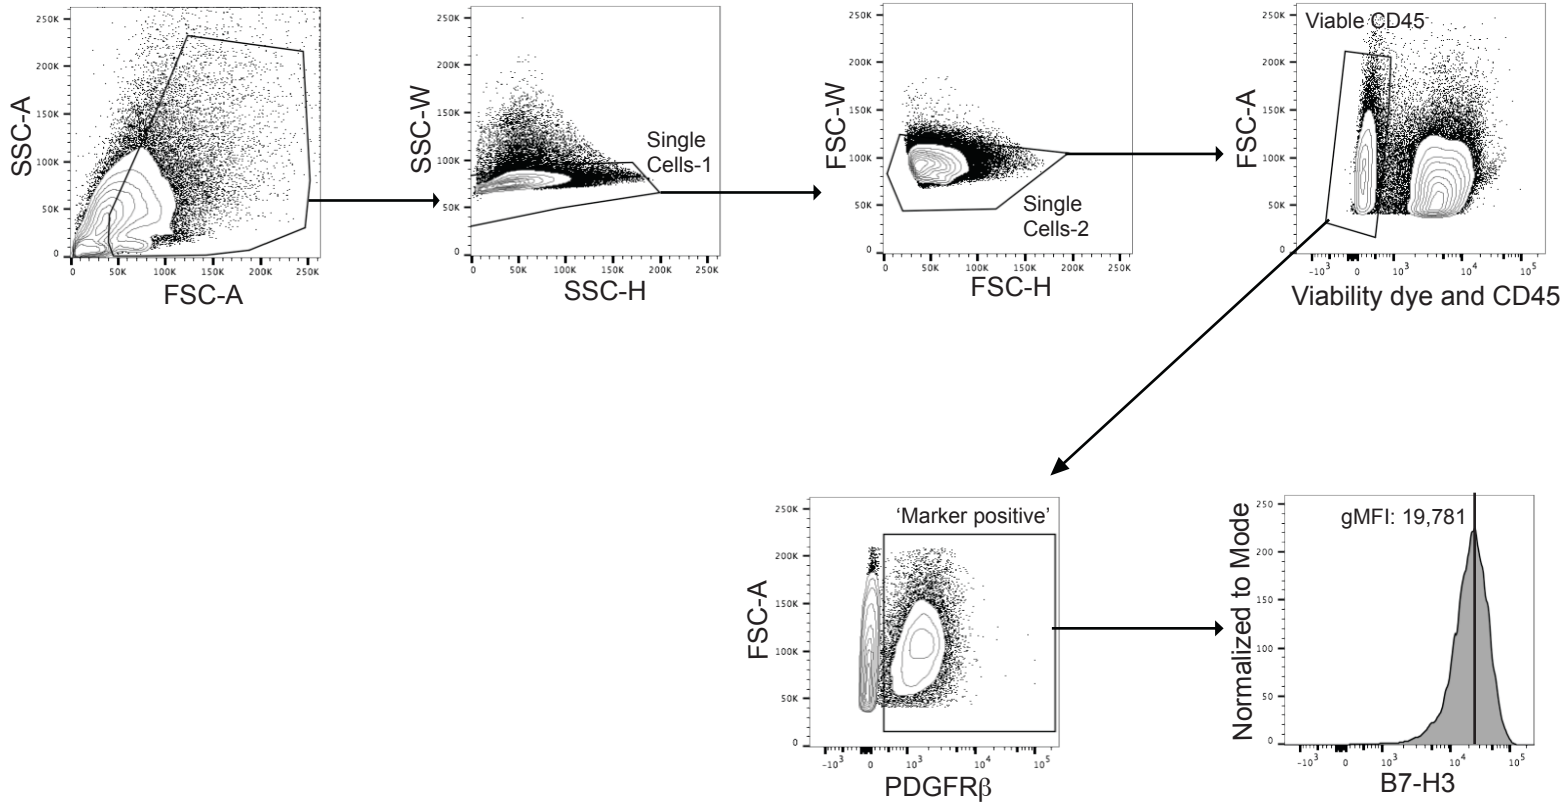

**A**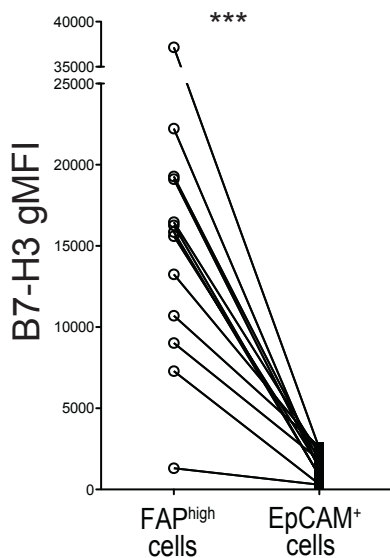**B**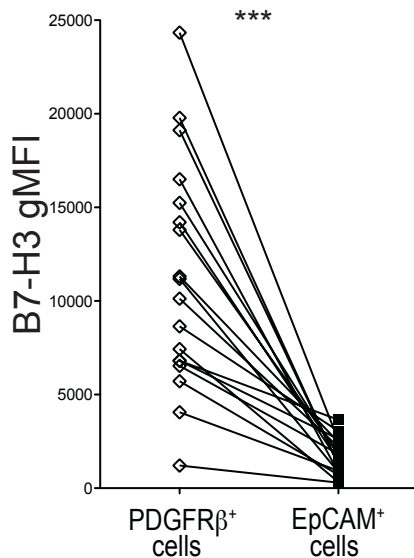**C**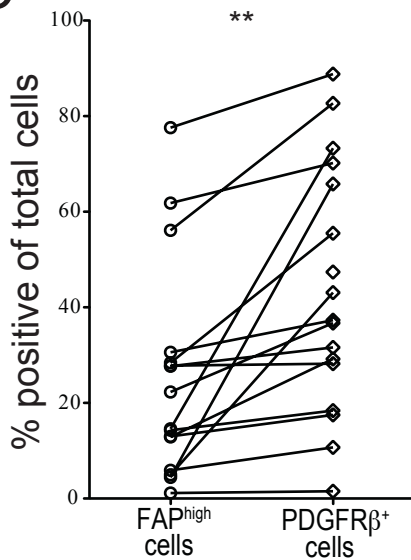**D**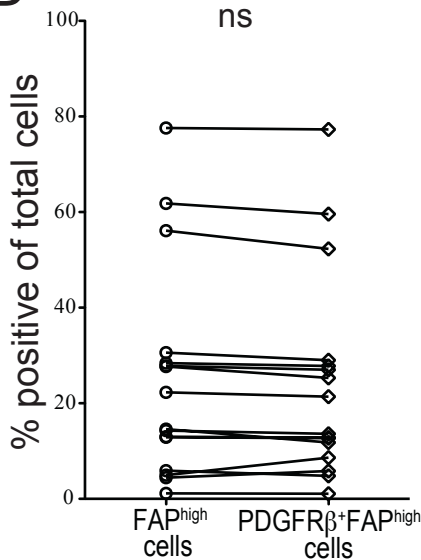

**A**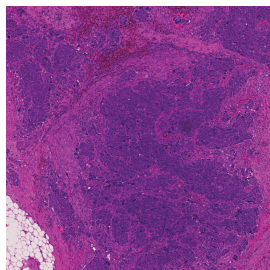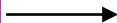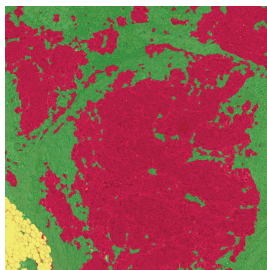

-  tumor
-  stroma
-  excluded from analysis

**B**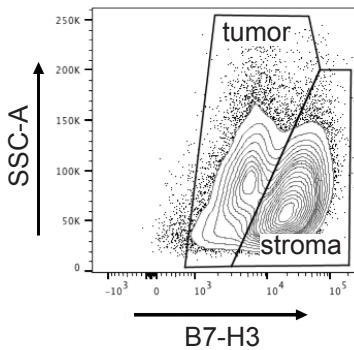

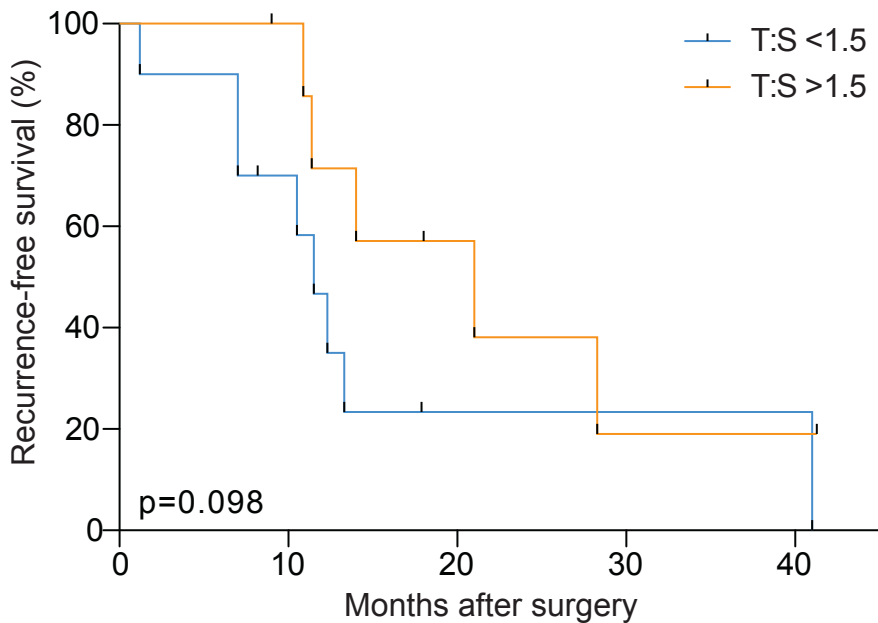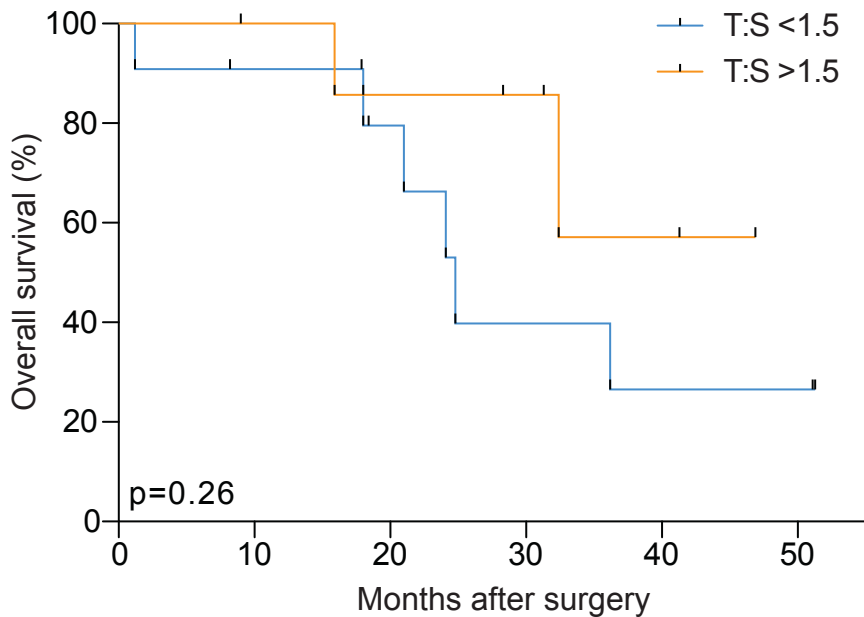

**A**

T cells

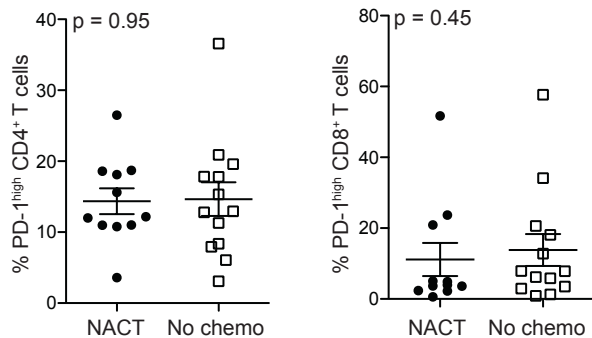**B**CD14<sup>+</sup> cells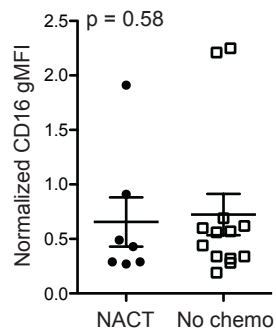**C**CD11c<sup>+</sup>HLA-DR<sup>high</sup> cells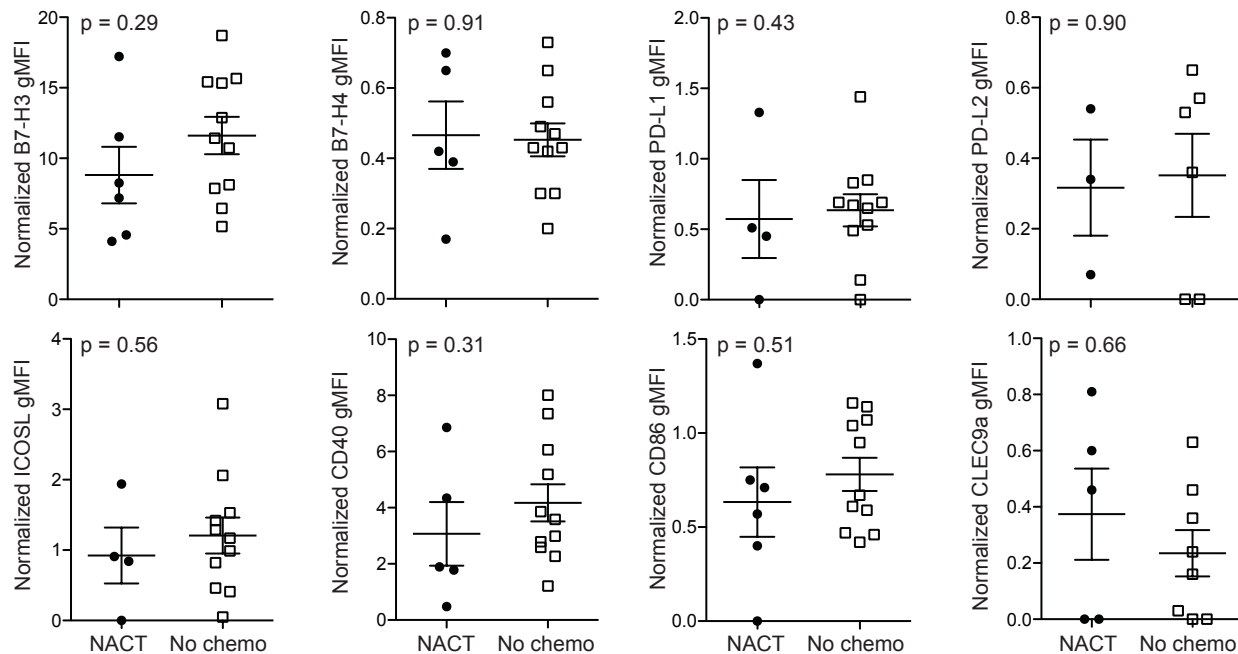



**A**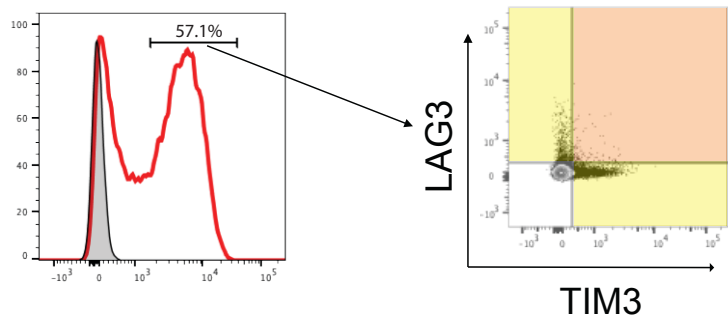**B**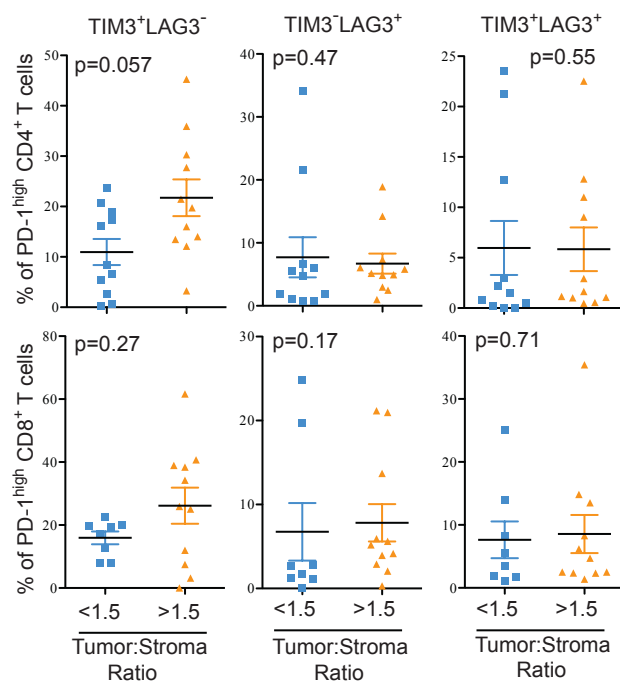**C**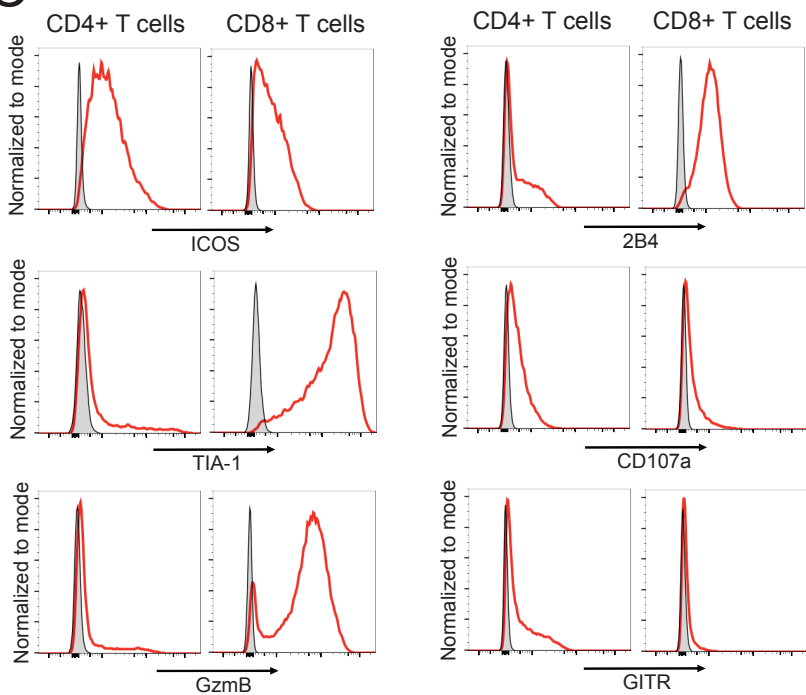**D**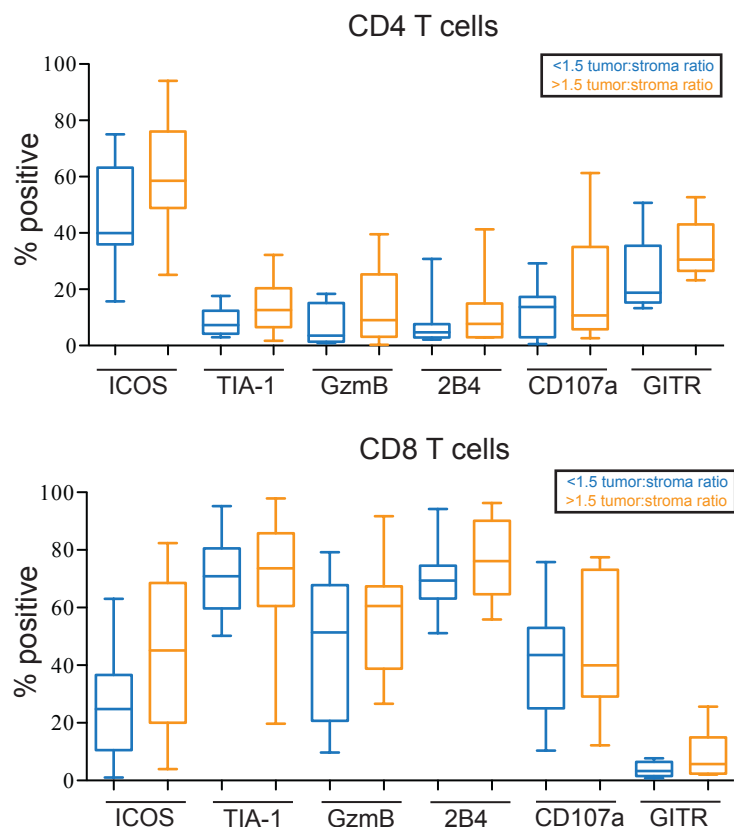

**A**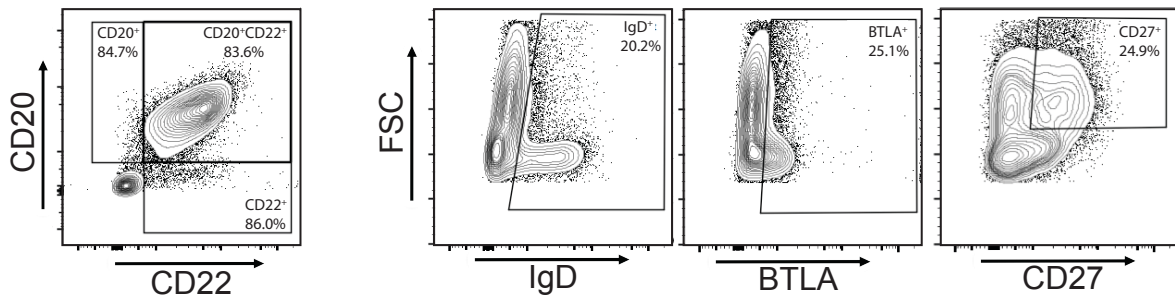**B**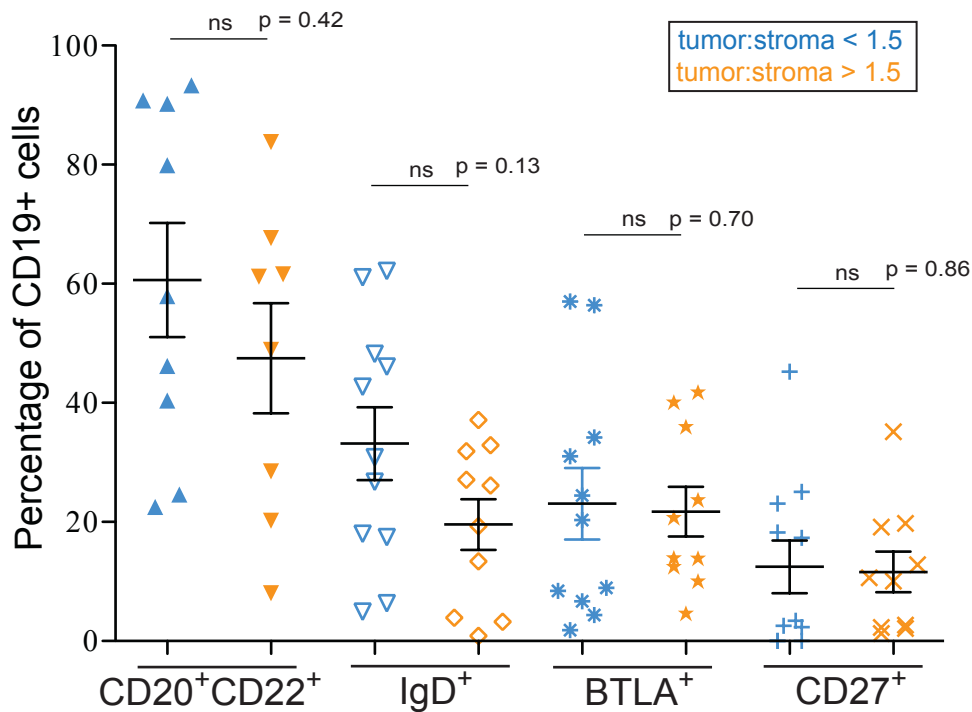

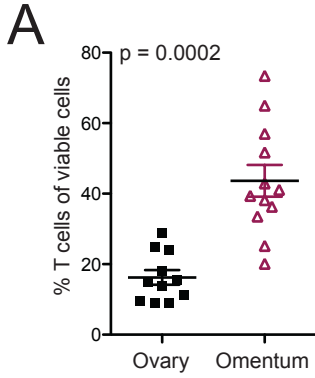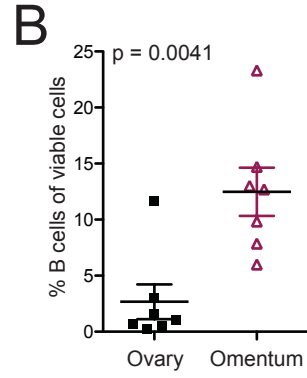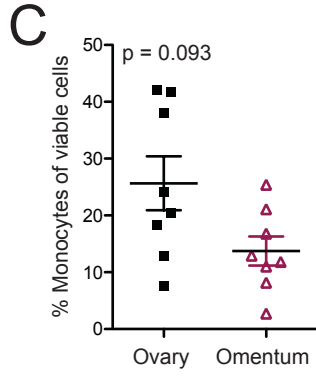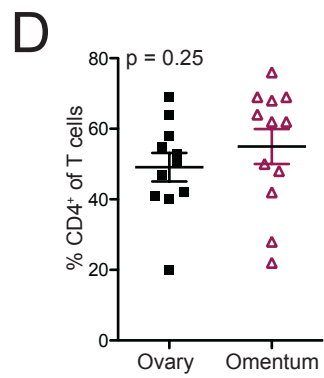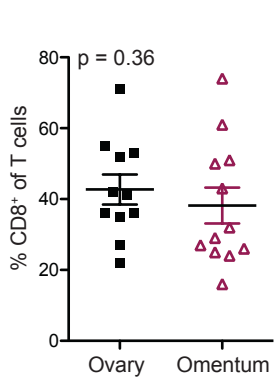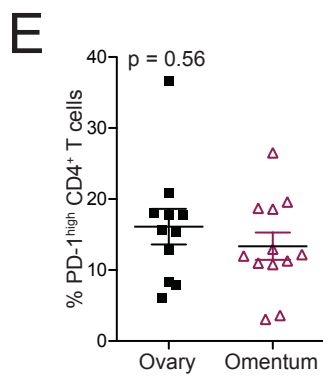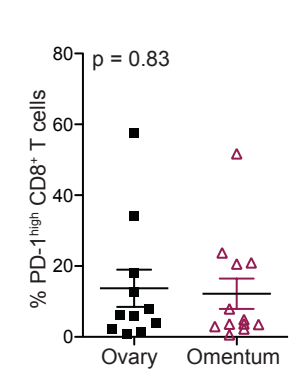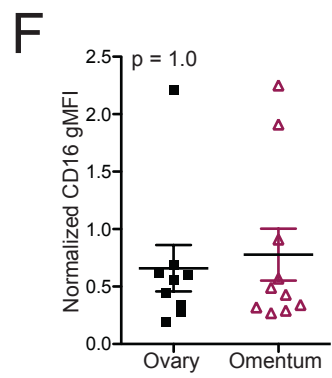

**G** CD11c<sup>+</sup>HLA-DR<sup>high</sup> cells

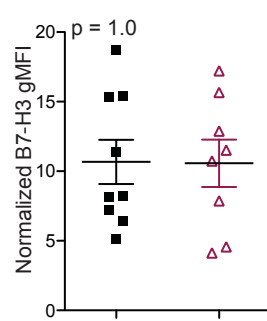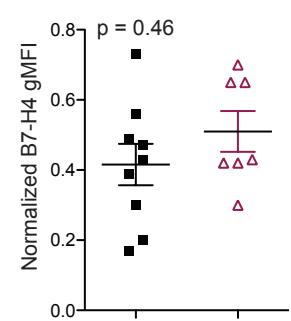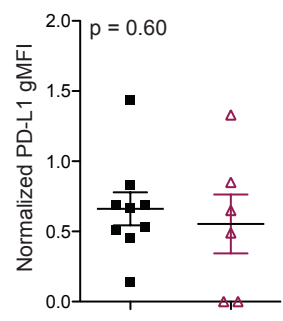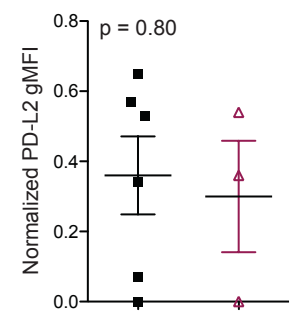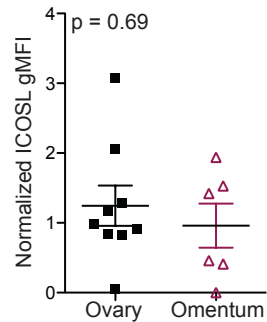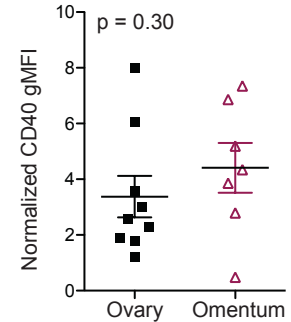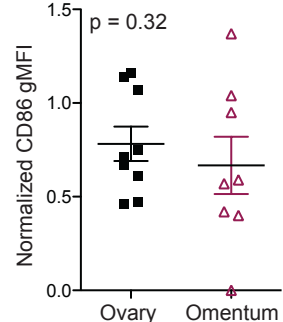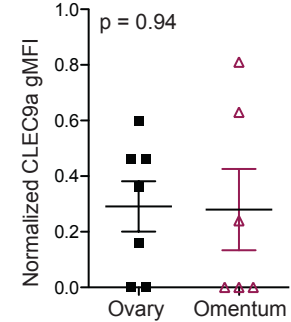

Supplement: 40425_2019_816_MOESM2_ESM.pdf [file 40425_2019_816_MOESM2_ESM.pdf]
